# Supplementary material for: DBU-catalyzed biobased poly(ethylene 2,5-furandicarboxylate) polyester with rapid melt crystallization: synthesis, crystallization kinetics and melting behavior
Source: Royal Society of Chemistry journal article supplement (doi:10.1039/c6ra21135f), 2016-01-01
Supplement: c6ra21135f1.pdf [file c6ra21135f1.pdf]

**DBU-Catalyzed Biobased Poly(ethylene 2,5-furandicarboxylate) Polyester with Rapid Melt Crystallization: Synthesis, Crystallization Kinetics and Melting Behavior**

Jiaping Wu, Hongzhou Xie, Linbo Wu\*, Bo-Geng Li, Philippe Dubois\*

**Electronic supplementary information**

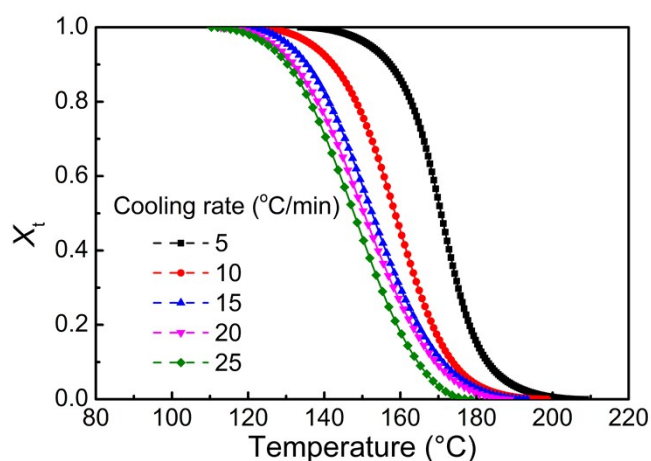

**Figure S1.** Plots of relative crystallinity  $X_t$  versus crystallization temperature  $T$  at different cooling rates for PEF.

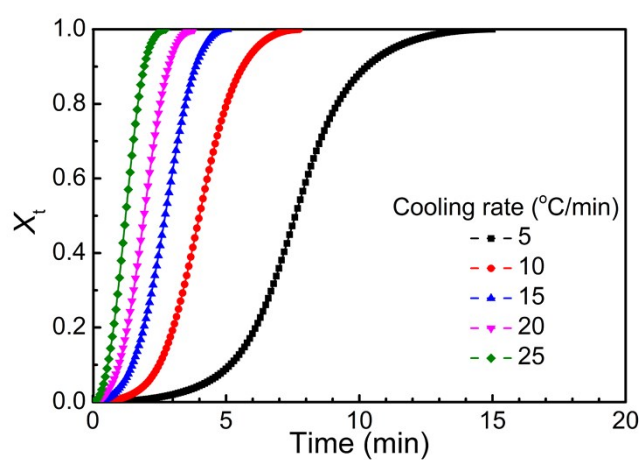

**Figure S2.** Plots of relative crystallinity  $X_t$  versus crystallization time  $t$  at different cooling rates for PEF.

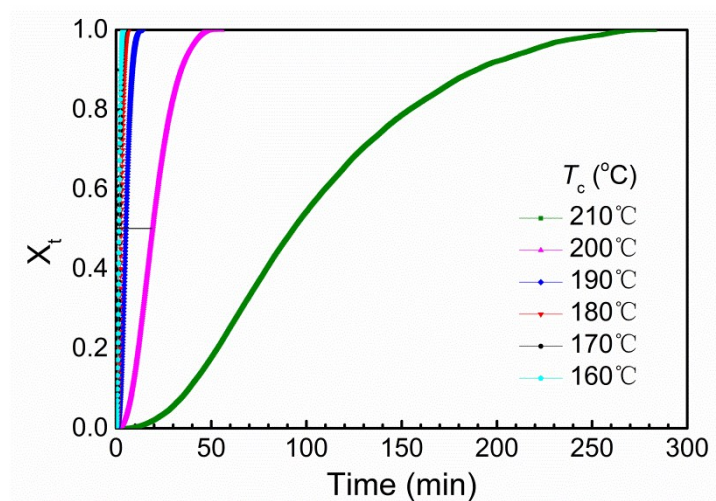

**Figure S3.** Plots of relative crystallinity  $X_t$  versus crystallization time  $t$  at different isothermal crystallization temperatures  $T_c$  for PEF.
